# Supplementary material
Source: PubMed Central journal article supplement (PMC3930625)

Supplementary Fig. 1

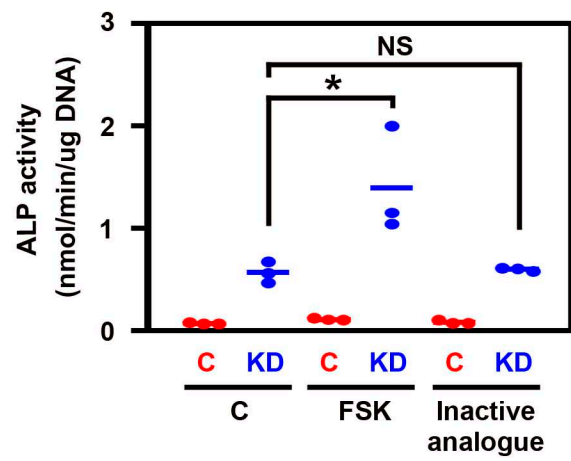

Supplementary Fig. 2

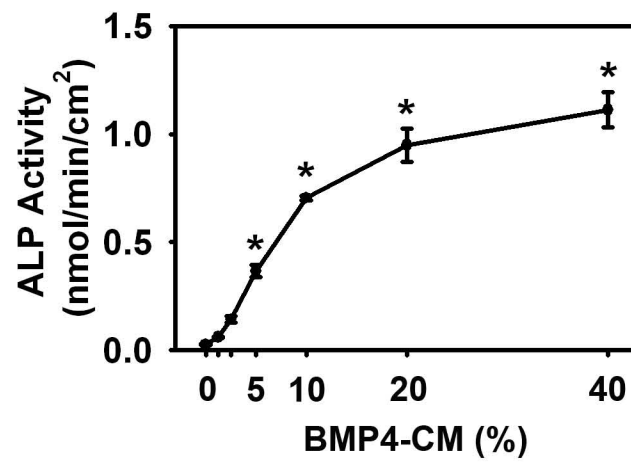

Supplementary Fig. 3

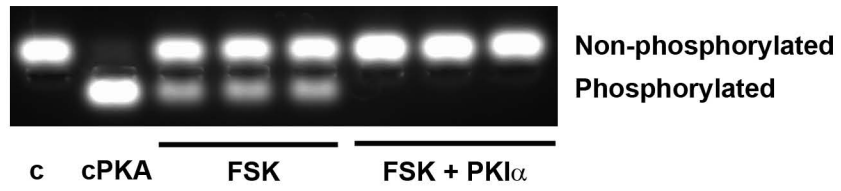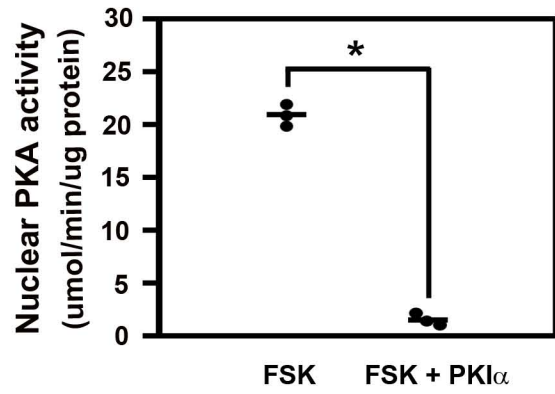

## Supplementary Fig. 4

**A**

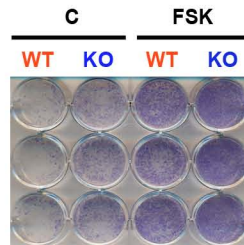

**B**

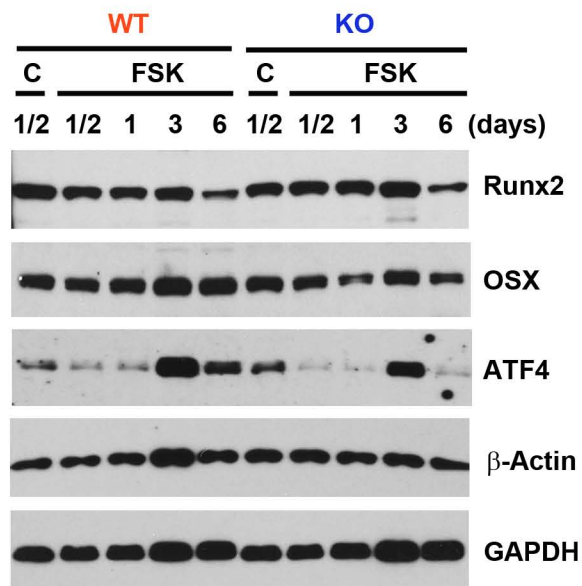

Supplementary Fig. 5

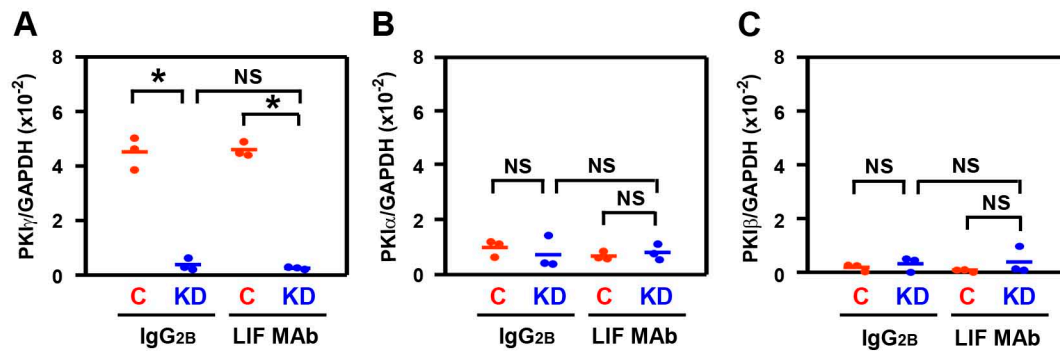

Supplement: NIHMS521972-supplement-Supp_Fig_S1-S5.pdf [file NIHMS521972-supplement-Supp_Fig_S1-S5.pdf]
